# Supplementary material for: Analyses of the Dmrt family in a decapod crab, Eriocheir sinensis uncover new facets on the evolution of DM domain genes
Source: Front Physiol. 2023 May 26;14:1201846. doi: 10.3389/fphys.2023.1201846 (PMC10252143; doi:10.3389/fphys.2023.1201846)
Supplement: Supplementary file 3 [file Table1.XLSX]

## Sheet: Supplementary Table 1
Supplementary Table 1 Annotation of the Dmrt family in Eriocheir sinensis
ID	Genes	NR GI	NR ID	NR Score	NR Evalue	NR Description	NT GI	NT ID	NT Score	NT Evalue	NT Description	KO ID	KO Name	KO Description	Http Link	Swissprot ID	Swissprot Score	Swissprot Evalue	Swissprot Description	PFAM ID	PFAM description	Gene Ontology Biological Pathway	BP Description	Gene Ontology Molecular Function	MF Description	Gene Ontology Cellular Component	CC Description	KOG ID	KOG Description
iDmrt1a	Cluster-52288.220179	568292406	ETN79829.1	182	1.1e-10	DM DNA binding domain protein [Necator americanus]	--	--	--	--	--	--	--	--	--	O18214	143	1.6e-07	Protein male abnormal 3 OS=Caenorhabditis elegans GN=mab-3 PE=1 SV=1	PF00751	DM DNA binding domain	GO:0006355	regulation of transcription, DNA-templated	GO:0043565	sequence-specific DNA binding	--	--	KOG3815	Transcription factor Doublesex
Dsx1	Cluster-52288.216843	408366917	AFU60552.1	249	5e-19	doublesex [Fenneropenaeus chinensis]	--	--	--	--	--	--	--	--	--	--	--	--	--	PF00751//PF04726	DM DNA binding domain//Microvirus J protein	GO:0006355	regulation of transcription, DNA-templated	GO:0043565//GO:0003677	sequence-specific DNA binding//DNA binding	--	--	--	--
	Cluster-52288.116909	408366917	AFU60552.1	208	4.7e-14	doublesex [Fenneropenaeus chinensis]	--	--	--	--	--	--	--	--	--	--	--	--	--	--	--	--	--	--	--	--	--	--	--
	Cluster-52288.156608	408366917	AFU60552.1	245	2.4e-18	doublesex [Fenneropenaeus chinensis]	--	--	--	--	--	--	--	--	--	--	--	--	--	PF04726//PF00751	Microvirus J protein//DM DNA binding domain	GO:0006355	regulation of transcription, DNA-templated	GO:0043565//GO:0003677	sequence-specific DNA binding//DNA binding	--	--	--	--
Dmrt93B	Cluster-52288.25875	524880540	XP_005096932.1	301	4.9e-25	PREDICTED: doublesex and mab-3 related transcription factor 3, truncated-like [Aplysia californica]>gi|524880542|ref|XP_005096933.1| PREDICTED: doublesex and mab-3 related transcription factor 3, truncated-like [Aplysia californica]	589929789	XM_006977645.1	66	5.28e-24	PREDICTED: Peromyscus maniculatus bairdii doublesex and mab-3 related transcription factor 3 (Dmrt3), mRNA	K19490	DMRT3	doublesex- and mab-3-related transcription factor 3	http://www.genome.jp/dbget-bin/www_bget?ko:K19490	Q5UU75	236	6.9e-19	Doublesex- and mab-3-related transcription factor A2 OS=Danio rerio GN=dmrta2 PE=2 SV=1	PF07448//PF00751	Secreted phosphoprotein 24 (Spp-24)//DM DNA binding domain	GO:0046849//GO:0006355	bone remodeling//regulation of transcription, DNA-templated	GO:0043565	sequence-specific DNA binding	GO:0005576	extracellular region	KOG3815	Transcription factor Doublesex
	Cluster-52288.43189	524880540	XP_005096932.1	294	1e-23	PREDICTED: doublesex and mab-3 related transcription factor 3, truncated-like [Aplysia californica]>gi|524880542|ref|XP_005096933.1| PREDICTED: doublesex and mab-3 related transcription factor 3, truncated-like [Aplysia californica]	589929789	XM_006977645.1	63	8.14e-22	PREDICTED: Peromyscus maniculatus bairdii doublesex and mab-3 related transcription factor 3 (Dmrt3), mRNA	K19490	DMRT3	doublesex- and mab-3-related transcription factor 3	http://www.genome.jp/dbget-bin/www_bget?ko:K19490	Q90WM5	229	1.4e-17	Doublesex- and mab-3-related transcription factor 3 OS=Takifugu rubripes GN=dmrt3 PE=2 SV=2	PF07448//PF00751	Secreted phosphoprotein 24 (Spp-24)//DM DNA binding domain	GO:0046849//GO:0006355	bone remodeling//regulation of transcription, DNA-templated	GO:0043565	sequence-specific DNA binding	GO:0005576	extracellular region	KOG3815	Transcription factor Doublesex
	Cluster-52288.264803	241169514	XP_002410401.1	404	1.6e-36	conserved hypothetical protein [Ixodes scapularis]	589929789	XM_006977645.1	74	5.71e-28	PREDICTED: Peromyscus maniculatus bairdii doublesex and mab-3 related transcription factor 3 (Dmrt3), mRNA	--	--	--	--	A4QNP7	269	3e-22	Doublesex- and mab-3-related transcription factor A2 OS=Xenopus tropicalis GN=dmrta2 PE=2 SV=1	PF00751//PF07448	DM DNA binding domain//Secreted phosphoprotein 24 (Spp-24)	GO:0007548//GO:0006355//GO:0046849	sex differentiation//regulation of transcription, DNA-templated//bone remodeling	GO:0043565	sequence-specific DNA binding	GO:0005634//GO:0005576	nucleus//extracellular region	KOG3815	Transcription factor Doublesex
	Cluster-52288.262806	780129558	XP_011679095.1	158	5e-08	PREDICTED: doublesex- and mab-3-related transcription factor A2-like [Strongylocentrotus purpuratus]	--	--	--	--	--	K19491	DMRT4_5, DMRTA	doublesex- and mab-3-related transcription factor 4/5	http://www.genome.jp/dbget-bin/www_bget?ko:K19491	A4QNP7	146	5e-08	Doublesex- and mab-3-related transcription factor A2 OS=Xenopus tropicalis GN=dmrta2 PE=2 SV=1	--	--	--	--	--	--	--	--	--	--
	Cluster-52288.61828	780129558	XP_011679095.1	158	4.6e-08	PREDICTED: doublesex- and mab-3-related transcription factor A2-like [Strongylocentrotus purpuratus]	--	--	--	--	--	K19491	DMRT4_5, DMRTA	doublesex- and mab-3-related transcription factor 4/5	http://www.genome.jp/dbget-bin/www_bget?ko:K19491	A4QNP7	146	4.7e-08	Doublesex- and mab-3-related transcription factor A2 OS=Xenopus tropicalis GN=dmrta2 PE=2 SV=1	--	--	--	--	--	--	--	--	--	--
iDMY	Cluster-52288.221408	391332005	XP_003740429.1	140	2.2e-06	PREDICTED: uncharacterized protein LOC100908210 [Metaseiulus occidentalis]	--	--	--	--	--	--	--	--	--	--	--	--	--	PF00751	DM DNA binding domain	GO:0006355	regulation of transcription, DNA-templated	GO:0043565	sequence-specific DNA binding	--	--	KOG3815	Transcription factor Doublesex
	Cluster-52288.228880	391332005	XP_003740429.1	140	3.3e-06	PREDICTED: uncharacterized protein LOC100908210 [Metaseiulus occidentalis]	--	--	--	--	--	--	--	--	--	A2A9I7	124	9.7e-06	Doublesex- and mab-3-related transcription factor B1 OS=Mus musculus GN=Dmrtb1 PE=2 SV=1	--	--	--	--	--	--	--	--	KOG3815	Transcription factor Doublesex
	Cluster-52288.221739	752891703	XP_011263904.1	156	4.7e-08	PREDICTED: doublesex- and mab-3-related transcription factor A2-like [Camponotus floridanus]	--	--	--	--	--	--	--	--	--	P83758	145	3.7e-08	Doublesex- and mab-3-related transcription factor 3a OS=Danio rerio GN=dmrt3a PE=1 SV=2	PF00751	DM DNA binding domain	GO:0006355	regulation of transcription, DNA-templated	GO:0043565	sequence-specific DNA binding	--	--	KOG3815	Transcription factor Doublesex
Dmrt1-like	Cluster-52288.55551	670449687	CDN30080.1	240	8.8e-18	female-like DSXF [Bradysia coprophila]	--	--	--	--	--	K19488	DMRT1	doublesex- and mab-3-related transcription factor 1	http://www.genome.jp/dbget-bin/www_bget?ko:K19488	P23023	229	6.8e-18	Protein doublesex OS=Drosophila melanogaster GN=dsx PE=1 SV=1	PF00751	DM DNA binding domain	GO:0006355	regulation of transcription, DNA-templated	GO:0043565	sequence-specific DNA binding	--	--	KOG3815	Transcription factor Doublesex
	Cluster-52288.61992	670449693	CDN30083.1	240	9.4e-18	male-like DSXM [Sciara ocellaris]	--	--	--	--	--	K19488	DMRT1	doublesex- and mab-3-related transcription factor 1	http://www.genome.jp/dbget-bin/www_bget?ko:K19488	Q3LH63	229	7.3e-18	Doublesex- and mab-3-related transcription factor 1A OS=Xenopus laevis GN=dmrt1-a PE=1 SV=1	PF00751	DM DNA binding domain	GO:0006355	regulation of transcription, DNA-templated	GO:0043565	sequence-specific DNA binding	--	--	KOG3815	Transcription factor Doublesex
Dmrt-like	Cluster-52288.42016	296426095	ADH15934.1	759	1.7e-77	Dmrt-like protein [Eriocheir sinensis]	296426094	HM051384.1	997	0	Eriocheir sinensis Dmrt-like protein mRNA, complete cds	K19491	DMRT4_5, DMRTA	doublesex- and mab-3-related transcription factor 4/5	http://www.genome.jp/dbget-bin/www_bget?ko:K19491	Q4AE28	293	7.7e-25	Doublesex- and mab-3-related transcription factor A2 OS=Takifugu rubripes GN=dmrta2 PE=2 SV=1	PF00751	DM DNA binding domain	GO:0006355	regulation of transcription, DNA-templated	GO:0043565	sequence-specific DNA binding	--	--	KOG3815	Transcription factor Doublesex
	Cluster-52288.66815	296426095	ADH15934.1	557	6.1e-54	Dmrt-like protein [Eriocheir sinensis]	296426094	HM051384.1	788	0	Eriocheir sinensis Dmrt-like protein mRNA, complete cds	K19491	DMRT4_5, DMRTA	doublesex- and mab-3-related transcription factor 4/5	http://www.genome.jp/dbget-bin/www_bget?ko:K19491	Q4AE28	293	1e-24	Doublesex- and mab-3-related transcription factor A2 OS=Takifugu rubripes GN=dmrta2 PE=2 SV=1	PF00751	DM DNA binding domain	GO:0006355	regulation of transcription, DNA-templated	GO:0043565	sequence-specific DNA binding	--	--	KOG3815	Transcription factor Doublesex
Dmrt11E	Cluster-52288.277073	582983313	AHI47024.1	384	4.1e-34	doublesex and mab-3 related transcription factor 11E [Macrobrachium rosenbergii]	--	--	--	--	--	--	--	--	--	--	--	--	--	PF16588	C2H2 zinc-finger	--	--	GO:0008270//GO:0003676	zinc ion binding//nucleic acid binding	--	--	--	--
	Cluster-52288.79806	582983313	AHI47024.1	336	5.5e-29	doublesex and mab-3 related transcription factor 11E [Macrobrachium rosenbergii]	144953830	EF495333.1	113	5.2e-50	Eriocheir sinensis double-sex and Mab-3 related transcription factor 2a gene, partial cds	K19489	DMRT2	doublesex- and mab-3-related transcription factor 2	http://www.genome.jp/dbget-bin/www_bget?ko:K19489	Q9Y5R5	312	1.4e-27	Doublesex- and mab-3-related transcription factor 2 OS=Homo sapiens GN=DMRT2 PE=2 SV=2	PF00751	DM DNA binding domain	GO:0006355	regulation of transcription, DNA-templated	GO:0043565	sequence-specific DNA binding	--	--	KOG3815	Transcription factor Doublesex
	Cluster-52288.79805	582983313	AHI47024.1	575	3e-56	doublesex and mab-3 related transcription factor 11E [Macrobrachium rosenbergii]	--	--	--	--	--	--	--	--	--	--	--	--	--	PF16588	C2H2 zinc-finger	--	--	GO:0008270//GO:0003676	zinc ion binding//nucleic acid binding	--	--	--	--
	Cluster-52288.84631	582983313	AHI47024.1	575	3e-56	doublesex and mab-3 related transcription factor 11E [Macrobrachium rosenbergii]	--	--	--	--	--	--	--	--	--	--	--	--	--	PF16588	C2H2 zinc-finger	--	--	GO:0003676//GO:0008270	nucleic acid binding//zinc ion binding	--	--	--	--
	Cluster-52288.79807	582983313	AHI47024.1	336	5e-29	doublesex and mab-3 related transcription factor 11E [Macrobrachium rosenbergii]	144953830	EF495333.1	113	4.72e-50	Eriocheir sinensis double-sex and Mab-3 related transcription factor 2a gene, partial cds	K19489	DMRT2	doublesex- and mab-3-related transcription factor 2	http://www.genome.jp/dbget-bin/www_bget?ko:K19489	Q9Y5R5	312	1.3e-27	Doublesex- and mab-3-related transcription factor 2 OS=Homo sapiens GN=DMRT2 PE=2 SV=2	PF00751	DM DNA binding domain	GO:0006355	regulation of transcription, DNA-templated	GO:0043565	sequence-specific DNA binding	--	--	KOG3815	Transcription factor Doublesex
	Cluster-52288.8961	582983313	AHI47024.1	309	1.2e-25	doublesex and mab-3 related transcription factor 11E [Macrobrachium rosenbergii]	144953830	EF495333.1	113	8.18e-50	Eriocheir sinensis double-sex and Mab-3 related transcription factor 2a gene, partial cds	K19489	DMRT2	doublesex- and mab-3-related transcription factor 2	http://www.genome.jp/dbget-bin/www_bget?ko:K19489	Q8BG36	288	1.3e-24	Doublesex- and mab-3-related transcription factor 2 OS=Mus musculus GN=Dmrt2 PE=1 SV=1	PF00751	DM DNA binding domain	GO:0006355	regulation of transcription, DNA-templated	GO:0043565	sequence-specific DNA binding	--	--	KOG3815	Transcription factor Doublesex
	Cluster-84488.0	582983313	AHI47024.1	309	1.1e-25	doublesex and mab-3 related transcription factor 11E [Macrobrachium rosenbergii]	144953830	EF495333.1	113	7.71e-50	Eriocheir sinensis double-sex and Mab-3 related transcription factor 2a gene, partial cds	K19489	DMRT2	doublesex- and mab-3-related transcription factor 2	http://www.genome.jp/dbget-bin/www_bget?ko:K19489	Q8BG36	288	1.2e-24	Doublesex- and mab-3-related transcription factor 2 OS=Mus musculus GN=Dmrt2 PE=1 SV=1	PF00751	DM DNA binding domain	GO:0006355	regulation of transcription, DNA-templated	GO:0043565	sequence-specific DNA binding	--	--	KOG3815	Transcription factor Doublesex
iDmrt1b	Cluster-52288.9480	309365893	CAP22659.2	188	1.4e-11	Protein CBR-DMD-8 [Caenorhabditis briggsae]	--	--	--	--	--	--	--	--	--	Q9TT01	128	5e-06	Doublesex- and mab-3-related transcription factor 1 OS=Sus scrofa GN=DMRT1 PE=2 SV=1	PF00751	DM DNA binding domain	GO:0006355	regulation of transcription, DNA-templated	GO:0043565	sequence-specific DNA binding	--	--	KOG3815	Transcription factor Doublesex
	Cluster-52288.9481	309365893	CAP22659.2	188	1.4e-11	Protein CBR-DMD-8 [Caenorhabditis briggsae]	--	--	--	--	--	--	--	--	--	Q9TT01	128	5.3e-06	Doublesex- and mab-3-related transcription factor 1 OS=Sus scrofa GN=DMRT1 PE=2 SV=1	PF00751	DM DNA binding domain	GO:0006355	regulation of transcription, DNA-templated	GO:0043565	sequence-specific DNA binding	--	--	KOG3815	Transcription factor Doublesex
	Cluster-52288.9484	309365893	CAP22659.2	188	1.2e-11	Protein CBR-DMD-8 [Caenorhabditis briggsae]	--	--	--	--	--	--	--	--	--	Q9TT01	128	4.3e-06	Doublesex- and mab-3-related transcription factor 1 OS=Sus scrofa GN=DMRT1 PE=2 SV=1	PF00751	DM DNA binding domain	GO:0006355	regulation of transcription, DNA-templated	GO:0043565	sequence-specific DNA binding	--	--	KOG3815	Transcription factor Doublesex
	Cluster-52288.9482	--	--	--	--	--	--	--	--	--	--	--	--	--	--	--	--	--	--	PF03145//PF00751	Seven in absentia protein family//DM DNA binding domain	GO:0006355//GO:0006511//GO:0007275	regulation of transcription, DNA-templated//ubiquitin-dependent protein catabolic process//multicellular organismal development	GO:0043565	sequence-specific DNA binding	GO:0005634	nucleus	KOG3815	Transcription factor Doublesex

## Sheet: Supplementary Table 2
Supplementary Table 2 The accession numbers of data used in this study
Experiment Title	Accession number	Note	Figure
Fertilized egg	SRX1818354	Gene expression analyze/Dmrt gene annotation	Figure 3A
Cell stage	SRX1818355	Gene expression analyze/Dmrt gene annotation	Figure 3A
Blastula	SRX1818356	Gene expression analyze/Dmrt gene annotation	Figure 3A
Gastrula	SRX1818358	Gene expression analyze/Dmrt gene annotation	Figure 3A
Egg nauplius	SRX1818359	Gene expression analyze/Dmrt gene annotation	Figure 3A
Eyed stage	SRX1818360	Gene expression analyze/Dmrt gene annotation	Figure 3A
Heartbeat stage	SRX1818361	Gene expression analyze/Dmrt gene annotation	Figure 3A
Hatched zoea	SRX1818362	Gene expression analyze/Dmrt gene annotation	Figure 3A
Zoea1	data from our lab	Gene expression analyze/Dmrt gene annotation	Figure 3A
Zoea3_F_1	SRX6816971	Gene expression analyze	Figure 3A
Zoea3_F_2	SRX6816970	Gene expression analyze	Figure 3A
Zoea3_F_3	SRX6816969	Gene expression analyze	Figure 3A
Zoea3_M_1	SRX6816974	Gene expression analyze	Figure 3A
Zoea3_M_2	SRX6816973	Gene expression analyze	Figure 3A
Zoea3_M_3	SRX6816972	Gene expression analyze	Figure 3A
Zoea5	data from our lab	Gene expression analyze/Dmrt gene annotation	Figure 3A
Megalopae-abdomen_1	SRX6792528	Gene expression analyze	Figure 3A
Megalopae-abdomen_2	SRX6792527	Gene expression analyze	Figure 3A
Megalopae-abdomen_3	SRX6792526	Gene expression analyze	Figure 3A
Megalopaes-cephalothorax_1	SRX6792525	Gene expression analyze	Figure 3A
Megalopaes-cephalothorax_2	SRX6792522	Gene expression analyze	Figure 3A
Megalopaes-cephalothorax_3	SRX6792521	Gene expression analyze	Figure 3A
Juvenile1	data from our lab	Gene expression analyze/Dmrt gene annotation	Figure 3A
Juvenile-abdomen_1	SRX6792532	Gene expression analyze	Figure 3A
Juvenile-abdomen_2	SRX6792524	Gene expression analyze	Figure 3A
Juvenile-abdomen_3	SRX6792523	Gene expression analyze	Figure 3A
Juvenile-cephalothorax_1	SRX6792531	Gene expression analyze	Figure 3A
Juvenile-cephalothorax_2	SRX6792530	Gene expression analyze	Figure 3A
Juvenile-cephalothorax_3	SRX6792529	Gene expression analyze	Figure 3A
AGT_SE_1	SRX10055718	Gene expression analyze	Figure 3B
AGT_SE_2	SRX10055719	Gene expression analyze	Figure 3B
AGT_SE_3	SRX10055720	Gene expression analyze	Figure 3B
AGT_SY_1	SRX10055713	Gene expression analyze	Figure 3B
AGT_SY_2	SRX10055714	Gene expression analyze	Figure 3B
AGT_SY_3	SRX10055717	Gene expression analyze	Figure 3B
ovary_1	SRX11071026	Gene expression analyze	Figure 3B
ovary_2	SRX11071025	Gene expression analyze	Figure 3B
ovary_3	SRX11071024	Gene expression analyze	Figure 3B
ovary_4	SRX11071023	Gene expression analyze	Figure 3B
testis_1	SRX2375203	Gene expression analyze	Figure 3B
testis_2	SRX2375204	Gene expression analyze	Figure 3B
testis_3	SRX2375209	Gene expression analyze	Figure 3B
Genome of Eriocheir sinensis	GCA_013436485.1	Dmrt gene annotation	-
Testis	SRX6989580	Dmrt gene annotation	-
Muscle	SRX6989579	Dmrt gene annotation	-
hepatopancreas	SRX6989578	Dmrt gene annotation	-
Gill	SRX6989577	Dmrt gene annotation	-
Eyestalk	SRX6989576	Dmrt gene annotation	-
AG from control group after eyestalk ablation_1	SRX6989748	Dmrt gene annotation	-
AG from control group after eyestalk ablation_2	SRX6989749	Dmrt gene annotation	-
AG from test group after eyestalk ablation_1	SRX6989752	Dmrt gene annotation	-
AG from test group after eyestalk ablation_2	SRX6989753	Dmrt gene annotation	-
AG from control group after IAG knockdown_1	SRX6989754	Dmrt gene annotation	-
AG from control group after IAG knockdown_2	SRX6989755	Dmrt gene annotation	-
Testis from control group after IAG knockdown_1	SRX6989756	Dmrt gene annotation	-
Testis from control group after IAG knockdown_2	SRX6989757	Dmrt gene annotation	-
AG from test group after IAG knockdown_1	SRX6989758	Dmrt gene annotation	-
AG from test group after IAG knockdown_2	SRX6989759	Dmrt gene annotation	-
Testis from test group after IAG knockdown_1	SRX6989750	Dmrt gene annotation	-
Testis from test group after IAG knockdown_2	SRX6989751	Dmrt gene annotation	-

## Sheet: Supplementary Table 3
Supplementary Table 3 Corresponding transcripts of Dmrt genes found in the SMRT libraries
Gene*	AG_S2	AG_S3	T_S2	T_S3
Dsx1	transcript_62488	transcript_15486	transcript_45046
	transcript_15067	transcript_43913
		transcript_60104
iDmrt1a	transcript_66536		transcript_6633	transcript_32977
	transcript_67650		transcript_54086	transcript_17647
			transcript_24098
			transcript_22615
iDMY	transcript_75825	transcript_86707
	transcript_27048	transcript_97728
	transcript_60903	transcript_10090
	transcript_52305	transcript_28058
		transcript_70703
		transcript_8850
iDmrt1b	transcript_37407
Dmrt-like		transcript_95558	transcript_64192	transcript_38081
* Genes not listed in this table were unable to find transcripts in SMRT libraries perhaps due to low expression.

## Sheet: Supplementary Table 4
Supplementary Table 4 Taxa and amino acid sequences used for the molecular phylogenetic analysis of Dmrt family.
Phylum	Class	Gene	ID	Accession number	species
Chordata	Actinopteri	Dmrt1	Dr_Dmrt1	AAQ04555.1	Danio rerio
Chordata	Amphibia	Dmrt1	Xl_Dmrt1	NP_001089969.1	Xenopus laevis
Chordata	Mammalia	Dmrt1	Bm_Dmrt1	ELR53308.1	Bos mutus
Chordata	Mammalia	Dmrt1	Mm_Dmrt1	AAO41736.1	Mus musculus
Chordata	Mammalia	Dmrt1	Hs_Dmrt1	NP_068770.2	Homo sapiens
Arthropoda	Branchiopoda	Dmrt11E	Dm_Dmrt11E	AB361069	Daphnia magna
Arthropoda	Branchiopoda	Dmrt11E	Ek_Dmrt11E	LR027813.1	Euperipatoides kanangrensis
Arthropoda	Hexapoda	Dmrt11E	Md_Dmrt11E	XP_019890834.1	Musca domestica
Arthropoda	Hexapoda	Dmrt11E	Bm_Dmrt11E	XP_004930266.1	Bombyx mori
Arthropoda	Hexapoda	Dmrt11E	Dm_Dmrt11E	NM_078591.3	Drosophila melanogaster
Arthropoda	Hexapoda	Dmrt11E	Td_Dmrt11E	Yasuhiko., et al 2022	Thermobia domestica
Arthropoda	Malacostraca	Dmrt11E	Es_Dmrt11E	this study	Eriocheir sinensis
Arthropoda	Malacostraca	Dmrt11E	Mr_Dmrt11E	AHI47024.1	Macrobrachium rosenbergii
Arthropoda	Malacostraca	Dmrt11E	Sp_Dmrt11E	Wan et al 2021	Scylla paramamosain
Arthropoda	Malacostraca	Dmrt11E	Sv_Dmrt11E	KY427008.1	Sagmariasus verreauxi
Arthropoda	Hexapoda	Dmrt1-like	Ha_Dmrt1-like	KAG7173790.1	Homarus americanus
Arthropoda	Hexapoda	Dmrt1-like	Mn_Dsx	MT188691.1	Macrobrachium nipponense
Arthropoda	Hexapoda	Dmrt1-like	Pc_Dmrt1-like	NC_059649.1	Procambarus clarkii
Arthropoda	Hexapoda	Dmrt1-like	Pt_Dmrt1-like	NC_059283.1	Portunus trituberculatus
Arthropoda	Malacostraca	Dmrt1-like	Es_Dsx-like	this study	Eriocheir sinensis
Arthropoda	Branchiopoda	Dmrt93B	Dm_Dmrt93B	AB361070	Daphnia magna
Arthropoda	Hexapoda	Dmrt93B	Bm_Dmrt93B	XP_004932028.3	Bombyx mori
Arthropoda	Hexapoda	Dmrt93B	Dm_Dmrt93B	NP_524428.1	Drosophila melanogaster
Arthropoda	Hexapoda	Dmrt93B	Tc_Dmrt93B	Tc_EFA12115_1	Tribolium castaneum
Arthropoda	Malacostraca	Dmrt93B	Es_Dmrt93B	this study	Eriocheir sinensis
Arthropoda	Udeonychophora	Dmrt93B	Ek_Dmrt93B	LR027814	Euperipatoides kanangrensis
Arthropoda	Diplopoda	Dmrt93B	Gm_Dmr93B	LR027811	Glomeris marginata
Arthropoda	Clitellata	Dmrt93B	Ha_Dmrt93B	MZ796193.1	Helobdella austinensis
Arthropoda	Priapulimorpha	Dmrt93B	Pc_Dmrt93B	XM_014819542.1	Priapulus caudatus
Arthropoda	Arachnida	Dmrt93B	Pt_Dmrt93B	XM_016071185.1	Parasteatoda tepidariorum
Arthropoda	Branchiopoda	Dmrt99B	Dm_Dmrt99B	AB361071	Daphnia magna
Arthropoda	Hexapoda	Dmrt99B	Bm_Dmrt99B	XP_004924389.2	Bombyx mori
Arthropoda	Hexapoda	Dmrt99B	Dm_Dmrt99B	NP_524549.1	Drosophila melanogaster
Arthropoda	Malacostraca	Dmrt99B	Es_Dmrt-like	this study	Eriocheir sinensis
Arthropoda	Malacostraca	Dmrt99B	Mr_Dmrt99B	KC801045.1	Macrobrachium rosenbergii
Arthropoda	Udeonychophora	Dmrt99B	Ek_Dmrt99B	LR027815	Euperipatoides kanangrensis
Arthropoda	Monogononta	Dmrt99B	Bk_Dmrt99B	JX908761.1	Brachionus koreanus
Arthropoda	Diplopoda	Dmrt99B	Gm_Dmrt99B	KC801045.1	Glomeris marginata
Arthropoda	Priapulimorpha	Dmrt99B	Pc_Dmrt99B	XM_014810247.1	Priapulus caudatus
Arthropoda	Arachnida	Dmrt99B	Pt_Dmrt99B	XM_016071184.1	Parasteatoda tepidariorum
Arthropoda	Branchiopoda	Dsx	Dm_Dsx1	AB569296.1	Daphnia magna
Arthropoda	Branchiopoda	Dsx	Dm_Dsx2	AB569298	Daphnia magna
Arthropoda	Branchiopoda	Dsx	Dp_Dsx1	AGJ52190.1	Daphnia pulex
Arthropoda	Branchiopoda	Dsx	Dc_Dsx1	AIL86779.1	Daphnia carina
Arthropoda	Branchiopoda	Dsx	Dc_Dsx2	AIL86780.1	Daphnia carina
Arthropoda	Branchiopoda	Dsx	Dg_Dsx1	BAM33609.1	Daphnia galeata
Arthropoda	Branchiopoda	Dsx	Dg_Dsx2	BAM33610.1	Daphnia galeata
Arthropoda	Branchiopoda	Dsx	Dp_Dsx2	BAM33608.1	Daphnia pulex
Arthropoda	Branchiopoda	Dsx	Mm_Dsx	BAM33613.1	Moina macropaeneus
Arthropoda	Branchiopoda	Dsx	Dt_Dsx	UDE22712.1	Daphnia tibetana
Arthropoda	Hexapoda	Dsx	Nl_Dsx	QJW82782.1	Nilaparvata lugens
Arthropoda	Hexapoda	Dsx	Tc_Dsx	NP_001345540.1	Tribolium castaneum
Arthropoda	Hexapoda	Dsx	Ag_Dsx	DQ137802.1	Anopheles gambiae
Arthropoda	Hexapoda	Dsx	Ao_Dsx	AY948420.1	Anastrepha obliqua
Arthropoda	Hexapoda	Dsx	Bm_Dsx	NM_001043406.1	Bombyx mori
Arthropoda	Hexapoda	Dsx	Dm_Dsx	M25292.1	Drosophila melanogaster
Arthropoda	Malacostraca	Dsx	Es_Dsx1	this study	Eriocheir sinensis
Arthropoda	Malacostraca	Dsx	Es_Dsx2	this study	Eriocheir sinensis
Arthropoda	Malacostraca	Dsx	Pj_Dsx1	BCJ03601.1	Penaeus japonicus
Arthropoda	Malacostraca	Dsx	Pj_Dsx2	BCJ03602.1	Penaeus japonicus
Arthropoda	Malacostraca	Dsx	Pc_Dsx	AUT13216.1	Penaeus chinensis
Arthropoda	Malacostraca	Dsx	Sp_Dsx	Wan et al 2021	Scylla paramamosain
Arthropoda	Malacostraca	Dsx	Mr_Dsx2	Wan et al 2022	Macrobrachium rosenbergii
Arthropoda	Malacostraca	Dsx	Mr_Dsx1	Wan et al 2022	Macrobrachium rosenbergii
Arthropoda	Malacostraca	Dsx	Sv_Dsx	ARK36621.1	Sagmariasus verreauxi
Arthropoda	Malacostraca	Dsx	Cq_Dsx	QDM55346.1	Cherax quadricarinatus
Arthropoda	Malacostraca	Dsx	Pm_Dsx1	Wan et al 2022	Penaeus monodon
Arthropoda	Malacostraca	Dsx	Pm_Dsx2	Wan et al 2022	Penaeus monodon
Arthropoda	Malacostraca	Dsx	Fc_Dsx	JQ965255.1	Fenneropenaeus chinensis
Arthropoda	Malacostraca	Dsx	Pc_Dsx	Wan et al 2022	Procambarus clarkii
Arthropoda	Malacostraca	Dsx	Lv_Dsx1	Wan et al 2022	Litopenaeus vannamei
Arthropoda	Malacostraca	Dsx	Lv_Dsx2	Wan et al 2022	Litopenaeus vannamei
Arthropoda	Malacostraca	Dsx	Mn_Dsx1	Wan et al 2022	Macrobrachium nipponense
Arthropoda	Malacostraca	Dsx	Mn_Dsx2	Wan et al 2022	Macrobrachium nipponense
Arthropoda	Malacostraca	Dsx	So_Dsx	Wan et al 2021	Scylla olivacea
Arthropoda	Malacostraca	Dsx	Pt_Dsx	Wan et al 2022	Portunus trituberculatus
Arthropoda	Hexapoda	Dsx-like	Aa_Dsx-like	GAZQ02010078.1	Aretaon asperrimus
Arthropoda	Hexapoda	Dsx-like	Ch_Dsx-like	NQII01000109.1	Clitarchus hookeri
Arthropoda	Hexapoda	Dsx-like	Ei_Dsx-like	GCCL01024227.1	Ecdyonurus insignis
Arthropoda	Hexapoda	Dsx-like	Me_Dsx-like	Medex_00099178-RA	Medauroidea extradentata
Arthropoda	Hexapoda	Dsx-like	Ps_Dsx-like	GAWJ02028457.1	Peruphasma schultei
Arthropoda	Hexapoda	Dsx-like	Tc_Dsx-like	GAVX02010884.1	Timema cristinae
Arthropoda	Hexapoda	Dsx-like	Tg_Dsx-like	GASO02037568.1	Tricholepidion gertschi
Arthropoda	Malacostraca	iDmrt1	Es_iDmrt1a	this study	Eriocheir sinensis
Arthropoda	Malacostraca	iDmrt1	Es_iDmrt1b	this study	Eriocheir sinensis
Arthropoda	Malacostraca	iDmrt1	Es_iDMY	this study	Eriocheir sinensis
Arthropoda	Malacostraca	iDmrt1	Pt_iDmrt1	NC_059271.1	Portunus trituberculatus
Arthropoda	Malacostraca	iDmrt1	So_iDmrt1	Wan et al 2021	Scylla olivacea
Arthropoda	Malacostraca	iDmrt1	Sp_iDmrt1	Wan et al 2021	Scylla paramamosain
Arthropoda	Malacostraca	iDmrt1	Sv_iDmrt1	KY427006.1	Sagmariasus verreauxi
Arthropoda	Malacostraca	iDmrt1	Sv_iDMY	KY427009.1	Sagmariasus verreauxi

## Sheet: Supplementary Table 5
Supplementary Table 5 Primers and sequences for siRNA synthesis used in this study
Experiment	Primer name	Sequence (5'-3')	Figure
RT-PCR	EsDsx1_F1	CTGTTTCCTTGTCCTCGTGTGT	Supplementary Figure 4B
RT-PCR	EsDsx1_R1	AGCCCCTGAGACCCGTTG	Supplementary Figure 4B
RT-PCR	EsDsx1_F2	GCCCGTCAAACGTTCCTCT	Supplementary Figure 4B
RT-PCR	EsDsx1_R2	AGTGCGAGTCCCTTACACCA	Supplementary Figure 4B
RT-PCR	EsDsx1_F3	CGGGGCGAGTTGTGTGA	Supplementary Figure 4B
RT-PCR	EsDsx1_R3	GCCGTGAAGTAAGGGGGTT	Supplementary Figure 4B
RT-PCR	Esβ-actin_F	GCATCCACGAGACCACTTACA	Supplementary Figure 4B
RT-PCR	Esβ-actin_R	CTCCTGCTTGCTGATCCACATC	Supplementary Figure 4B
RT-PCR	EsiDMY_F1	TCATGAGGCGAATGTCGCAT	Supplementary Figure 5B
RT-PCR	EsiDMY_R1	ACCGATGTTTTGCCTTCGTTT	Supplementary Figure 5B
RT-PCR	EsiDMY_F2	ACGAGGATTGCTCTTGTGACC	Supplementary Figure 5C
RT-PCR	EsiDMY_R2	TCTTCGTCCCTTCTTTTCCG	Supplementary Figure 5C
RNAi	EsDsx1C_siRNA_F	CUGGAGGAGACGAACAAUATT	-
RNAi	EsDsx1C_siRNA_R	UAUUGUUCGUCUCCUCCAGCA	-
RNAi	EsDsx1M1_siRNA_F	CUCCCUUUGUCUGUUAUCUTT	-
RNAi	EsDsx1M1_siRNA_R	AGAUAACAGACAAAGGGAGTT	-
RNAi	EsDsx1M2_siRNA_F	CGCCACAUUGGGUAAUUCATT	-
RNAi	EsDsx1M2_siRNA_R	UGAAUUACCCAAUGUGGCGGC	-
RNAi	EsiDmrt1a_siRNA_F	GCAACCACGGCAUCAUCAATT	-
RNAi	EsiDmrt1a_siRNA_R	UUGAUGAUGCCGUGGUUGCGA	-
RNAi	EsiDMYS_siRNA_F	GCCAGGAUUACUGCAUCAUTT	-
RNAi	EsiDMYS_siRNA_R	AUGAUGCAGUAAUCCUGGCTT	-
RNAi	EsiDMYL_siRNA_F	GCUGGUCUCCCUUACUUCATT	-
RNAi	EsiDMYL_siRNA_R	UGAAGUAAGGGAGACCAGCTT	-
RNAi	NC_siRNA_F	UUCUCCGAACGUGUCACGUTT	-
RNAi	NC_siRNA_R	ACGUGACACGUUCGGAGAATT	-
RT-qPCR	EsDsx1M1_RTF	CTGTTTCCTTGTCCTCGTGTGT	Figure 4A
RT-qPCR	EsDsx1M1_RTR	AGCCCCTGAGACCCGTTG	Figure 4A
RT-qPCR	EsDsx1M2_RTF	GCCCGTCAAACGTTCCTCT	Figure 4A
RT-qPCR	EsDsx1M2_RTR	AGTGCGAGTCCCTTACACCA	Figure 4A
RT-qPCR	EsiDmrt1a_RTF	GCCCACCTGACCAAATCTCTT	Figure 4A
RT-qPCR	EsiDmrt1a_RTR	CTGGTGGTTGTTGAGGTCGG	Figure 4A
RT-qPCR	EsiDMYL_RTF	GCCTCCAAGAAGGTCCGAAG	Figure 4A
RT-qPCR	EsiDMYL_RTR	CGCTGATATTCTCCTCGGCT	Figure 4A
RT-qPCR	EsIAG_RTF	GCTCCTACAAGCAGCACCC	Figure 4B
RT-qPCR	EsIAG_RTR	AGGGTCTTCCAGATGGATCG	Figure 4B

## Sheet: Supplementary Table 6
Supplementary Table 6 Results of independent sample T-test for the expression levels of EsDmrt and EsIAG genes in androgenic gland after RNAi
Experiment	Treatment	Average(2^(-ΔΔCt))	Average(log10(2^(-ΔΔCt)))	Sample size	P-value (T-test)	Significance	Figure
EsDsx1M1 expression in AG	siDsx1M1 injection	2.16664	-0.11586	4	0.00411406	**	Figure 4A
	siControl injection	14.9718	0.422897	3			Figure 4A
	saline injection	1.82298	0	6	-	-	-
EsDsx1M2 expression in AG	siDsx1M2 injection	0.558131	-0.355972	6	0.002	**	Figure 4A
	siControl injection	6.91617	0.459523	4			Figure 4A
	saline injection	1.45267	0	6	-	-	-
EsiDmrt1a expression in AG	siEsiDmrt1a injection	0.666442	-0.311442	3	0.049742	*	Figure 4A
	siControl injection	0.672649	-0.210096	4			Figure 4A
	saline injection	1.03282	0	6	-	-	-
EsiDMY expression in AG	siEsiDMY injection	1.26861	-0.213404	3	0.038	*	Figure 4A
	siControl injection	0.622518	-0.240664	3			Figure 4A
	saline injection	1.1645	0	6	-	-	-
EsIAG expression in AG	siDsx1M1 injection	1.42613	0.132355	5	0.044	*	Figure 4B
	siDsx1M2 injection	0.476827	-0.45847	6	0.003	**	Figure 4B
	siEsiDmrt1a injection	0.306686	-0.648227	6	0.035	*	Figure 4B
	siEsiDMY injection	0.0223676	-1.83962	6	0.003	**	Figure 4B
	siControl injection	2.93385	0.465861	3	-	-	Figure 4B
	saline injection	1.2826	0	5	-	-	-

## Sheet: Supplementary Table 7
Supplementary Table 7 Accession numbers of sequences used for the consensus analysis of the DM domain
Group	Species	Gene	Accession Number
Dmrt1	Bufo marinus	Dmrt1	FJ697175
Dmrt1	Rana livida	Dmrt1b	EU418494.1
Dmrt1	Crocodylus palustris	Dmrt1	EU526604.1
Dmrt1	Eremias brenchleyi	Dmrt1	DQ010115.1
Dmrt1	Trimeresurus flavoviridis	Dmrt1	AB254801.1
Dmrt1	Elaphe quadrivirgata	Dmrt1	AB179698.1
Dmrt1	Mauremys reevesii	Dmrt1	AB365876.1
Dmrt1	Pelodiscus sinensis	Dmrt1	AB179697.1
Dmrt1	Pleurodeles waltl	Dmrt1	DQ265802.1
Dmrt1	Xenopus borealis	Dmrt1a	HQ225638
Dmrt1	Xenopus laevis	Dmrt1b	NM_001085483.1
Dmrt1	Xenopus melleri	Dmrt1a	HQ225640
Dmrt1	Xenopus melleri	Dmrt1b	HQ225641
Dmrt1	Xenopus laevis	Dmrt1a	NM_001096500.1
Dmrt1	Gallus gallus	Dmrt1	AF123456
Dmrt1	Odorrana schmackeri	Dmrt1	GQ153839.1
Dmrt1	Rana livida	Dmrt1a	EU418493.1
Dmrt1	Rana rugosa	Dmrt1	AB272609.1
Dmrt1	Microhyla ornata	Dmrt1	DQ401170.1
Dmrt1	Rana nigromaculata	Dmrt1	EF524050.1
Dmrt1	Xenopus laevis	DmW	AB259777.1
Dmrt1	Acanthopagrus schlegelii	Dmrt1	AY323953.1
Dmrt1	Dicentrarchus labrax	Dmrt1a	AM993095.1
Dmrt1	Dicentrarchus labrax	Dmrt1b	AM993096.1
Dmrt1	Epinephelus merra	Dmrt1b	EU555178.1
Dmrt1	Epinephelus merra	Dmrt1a	EU555179.1
Dmrt1	Gasterosteus aculeatus	Dmrt1	AY867870.1
Dmrt1	Odontesthes hatcheri	Dmrt1b	EU864153.1
Dmrt1	Odontesthes hatcheri	Dmrt1c	EU864154.1
Dmrt1	Odontesthes hatcheri	Dmrt1a	EU864152.1
Dmrt1	Pseudolabrus japonicus	Dmrt1	DQ062159.1
Dmrt1	Monopterus albus	Dmrt1	AF421350.1
Dmrt1	Halichoeres tenuispinis	Dmrt1	AY177711.2
Dmrt1	Tetraodon nigroviridis	Dmrt1a	AY152820.1
Dmrt1	Tetraodon nigroviridis	Dmrt1b	AY135175.1
Dmrt1	Clarias fuscus	Dmrt1	JN033791
Dmrt1	Clarias gariepinus	Dmrt1a	FJ596554.1
Dmrt1	Clarias gariepinus	Dmrt1b	FJ596555.1
Dmrt1	Pelteobagrus fulvidraco	Dmrt1	HM245921.1
Dmrt1	Oncorhynchus mykiss	Dmrt1	NM_001124269.1
Dmrt1	Danio rerio	Dmrt1a	NM_205628
Dmrt1	Danio rerio	Dmrt1b	NM_205761
Dmrt1	Squalius alburnoides	Dmrt1	EU199440.1
Dmrt1	Squalius pyrenaicus	Dmrt1	EU199439.1
Dmrt1	Paramisgurnus dabryanus	Dmrt1	EF090603.1
Dmrt1	Gobiocypris rarus	Dmrt1	JQ413415.1
Dmrt1	Paralichthys olivaceus	Dmrt4	EU490514.1
Dmrt1	Takifugu rubripes	Dmrt1	NM_001037949.1
Dmrt1	Xiphophorus maculatus	Dmrt1	AF529187.1
Dmrt1	Oryzias celebensis	Dmrt1	AY239587.1
Dmrt1	Oryzias marmoratus	Dmrt1	AY521023.1
Dmrt1	Oryzias mekongensis	Dmrt1	AY521020.1
Dmrt1	Oryzias latipes	Dmrt1a	AY442916.1
Dmrt1	Oryzias curvinotus	Dmrt1	AB091696.1
Dmrt1	Oryzias luzonensis	Dmrt1	AB428666.1
Dmrt1	Gadus morhua	Dmrt1	AJ506094.1
Dmrt1	Hippoglossus hippoglossus	Dmrt1	AJ506093.1
Dmrt1	Acipenser baerii	Dmrt1	HQ110106.1
Dmrt1	Oryzias latipes	Dmrt1bY	AY524416.1
Dmrt1	Xenopus borealis	Dmrt1b	HQ225639
Dmrt11E	Daphnia magna	Dmrt11E	AB361069
Dmrt11E	Macrobrachium rosenbergii	Dmrt11E	AHI47024.1
Dmrt11E	Drosophila busckii	Dmrt11E	ALC49006.1
Dmrt11E	Brachionus sp.	Dmrt11E	JX908759.1
Dmrt11E	Panulirus ornatus	Dmrt11E	Wan et al., 2021
Dmrt11E	Scylla olivacea	Dmrt11E	Wan et al., 2021
Dmrt11E	Scylla paramamosain	Dmrt11E	Wan et al., 2021
Dmrt11E	Eriocheir sinensis	Dmrt11E	this study
Dmrt11E	Sagmariasus verreauxi	Dmrt11E	KY427008.1
Dmrt11E	Euperipatoides kanangrensis	Dmrt11E	LR027813.1
Dmrt11E	Drosophila melanogaster	Dmrt11E	NM_078591.3
Dmrt11E	Macrobrachium nipponense	Dmrt11E	QBS13812.1
Dmrt93B	Daphnia magna	Dmrt93B	AB361070
Dmrt93B	Glomeris marginata	Dmrt93B	LR027811
Dmrt93B	Euperipatoides kanangrensis	Dmrt93B	LR027814
Dmrt93B	Eriocheir sinensis	Dmrt93B	this study
Dmrt93B	Helobdella austinensis	Dmrt93B	MZ796193.1
Dmrt93B	Drosophila melanogaster	Dmrt93B	NP_524428.1
Dmrt93B	Tribolium castaneum	Dmrt93B	EFA12115_1
Dmrt93B	Priapulus caudatus	Dmrt93B	XM_014819542.1
Dmrt93B	Parasteatoda tepidariorum	Dmrt93B	XM_016071185.1
Dmrt99B	Daphnia magna	Dmrt99B	AB361071
Dmrt99B	Brachionus sp.	Dmrt99B	JX908761.1
Dmrt99B	Macrobrachium rosenbergii	Dmrt99B	KC801045.1
Dmrt99B	Glomeris marginata	Dmrt99B	LR027812
Dmrt99B	Euperipatoides kanangrensis	Dmrt99B	LR027815
Dmrt99B	Drosophila melanogaster	Dmrt99B	NP_524549.1
Dmrt99B	Priapulus caudatus	Dmrt99B	XM_014810247.1
Dmrt99B	Eriocheir sinensis	Dmrt99B	this study
Dmrt99B	Parasteatoda tepidariorum	Dmrt99B	XM_016071184.1
iDmrt1	Sagmariasus verreauxi	iDmrt1	KY427006.1
iDmrt1	Sagmariasus verreauxi	iDMY	KY427009.1
iDmrt1	Portunus trituberculatus	iDmrt1	NC_059271.1
iDmrt1	Eriocheir sinensis	iDmrt1-1	this study
iDmrt1	Eriocheir sinensis	iDmrt1-2	this study
iDmrt1	Eriocheir sinensis	iDMY	this study
iDmrt1	Scylla paramamosain	iDmrt1	Wan et al., 2021
iDmrt1	Scylla olivacea	iDmrt1	Wan et al., 2021
Dsx_non-Malacostraca	Nilaparvata lugens	Dsx	QJW82782.1
Dsx_non-Malacostraca	Daphnia tibetana	Dsx	UDE22712.1
Dsx_non-Malacostraca	Daphnia magna	Dsx1	AB569296.1
Dsx_non-Malacostraca	Daphnia magna	Dsx2	AB569298
Dsx_non-Malacostraca	Daphnia pulex	Dsx	AGJ52190.1
Dsx_non-Malacostraca	Daphnia carinata	Dsx1	AIL86779.1
Dsx_non-Malacostraca	Daphnia carinata	Dsx2	AIL86780.1
Dsx_non-Malacostraca	Anastrepha obliqua	DsxF	AY948420.1
Dsx_non-Malacostraca	Anopheles gambiae	DsxF	DQ137802.1
Dsx_non-Malacostraca	Drosophila melanogaster	Dsx	M25292.1
Dsx_non-Malacostraca	Bombyx mori	Dsx	NM_001043406.1
Dsx_non-Malacostraca	Tribolium castaneum	Dsx	NP_001345540.1
Dsx_Malacostraca	Penaeus chinensis	Dsx	AUT13216.1
Dsx_Malacostraca	Penaeus japonicus	Dsx1	BCJ03601.1
Dsx_Malacostraca	Penaeus japonicus	Dsx2	BCJ03602.1
Dsx_Malacostraca	Macrobrachium rosenbergii	Dsx	QDE10516.1
Dsx_Malacostraca	Cherax quadricarinatus	Dsx	QDM55346.1
Dsx_Malacostraca	Penaeus monodon	Dsx	QVK09798.1
Dsx_Malacostraca	Eriocheir sinensis	Dsx1	this study
Dsx_Malacostraca	Eriocheir sinensis	Dsx2	this study
Dsx_Malacostraca	Scylla paramamosain	Dsx	Wan et al., 2021
Dsx_Malacostraca	Scylla olivacea	Dsx	Wan et al., 2021
Dsx_Malacostraca	Sagmariasus verreauxi	Dsx	ARK36621.1

## Sheet: Supplementary Table 8
Supplementary Table 8 Sequences used for site models of iDmrt1
Class	Gene	ID	Accession number	species
Malacostraca	iDmrt1	Es_iDmrt1a	this study	Eriocheir sinensis
Malacostraca	iDmrt1	Es_iDmrt1b	this study	Eriocheir sinensis
Malacostraca	iDmrt1	Es_iDMY	this study	Eriocheir sinensis
Malacostraca	iDmrt1	Pt_iDmrt1	NC_059271.1	Portunus trituberculatus
Malacostraca	iDmrt1	Sv_iDmrt1	KY427006.1	Sagmariasus verreauxi
Malacostraca	iDmrt1	Sv_iDMY	KY427009.1	Scylla paramamosain
Malacostraca	iDmrt1	Mr_iDmrt1a	MK468649	Macrobrachium rosenbergii
Malacostraca	iDmrt1	Mr_iDmrt1b	MK468650	Macrobrachium rosenbergii
Malacostraca	iDmrt1	Mr_iDmrt1c	MK468651	Macrobrachium rosenbergii
Malacostraca	iDmrt1	Mr_iDmrt1d	MK468652	Macrobrachium rosenbergii

## Sheet: Supplementary Table 9
Supplementary Table 9 Sequences used for branch-site models and ancestral sequence reconstruction of Dsx
Class	Gene	ID	Accession number	species
Branchiopoda	Dsx	Dm_Dsx1	AB569296.1	Daphnia magna
Branchiopoda	Dsx	Dm_Dsx2	AB569298	Daphnia magna
Branchiopoda	Dsx	Dp_Dsx1	AGJ52190.1	Daphnia pulex
Branchiopoda	Dsx	Dc_Dsx1	AIL86779.1	Daphnia carina
Branchiopoda	Dsx	Dc_Dsx2	AIL86780.1	Daphnia carina
Branchiopoda	Dsx	Dg_Dsx1	BAM33609.1	Daphnia galeata
Branchiopoda	Dsx	Dg_Dsx2	BAM33610.1	Daphnia galeata
Branchiopoda	Dsx	Dp_Dsx2	BAM33608.1	Daphnia pulex
Branchiopoda	Dsx	Mm_Dsx	BAM33613.1	Moina macropaeneus
Branchiopoda	Dsx	Dt_Dsx	UDE22712.1	Daphnia tibetana
Malacostraca	Dsx	Es_Dsx1	this study	Eriocheir sinensis
Malacostraca	Dsx	Es_Dsx2	this study	Eriocheir sinensis
Malacostraca	Dsx	Pj_Dsx1	BCJ03601.1	Penaeus japonicus
Malacostraca	Dsx	Pj_Dsx2	BCJ03602.1	Penaeus japonicus
Malacostraca	Dsx	Pc_Dsx	AUT13216.1	Penaeus chinensis
Malacostraca	Dsx	Sv_Dsx	ARK36621.1	Sagmariasus verreauxi
Malacostraca	Dsx	Cq_Dsx	QDM55346.1	Cherax quadricarinatus
Malacostraca	Dsx	Fc_Dsx	JQ965255.1	Fenneropenaeus chinensis
Malacostraca	Dsx	Sp_Dsx	Wan et al 2021	Scylla paramamosain
Hexapoda	Dsx	Bm_Dsx	NM_001043406.1	Bombyx mori
Hexapoda	Dsx	Dm_Dsx	M25292.1	Drosophila melanogaster
Hexapoda	Dsx	Ha_Dsx	XP_021192052.1	Helicoverpa armigera
Hexapoda	Dsx	Pa_Dsx	XP_039758070.1	Pararge aegeria
Hexapoda	Dsx	Cc_Dsx	XP_012158607.1	Ceratitis capitata
Hexapoda	Dsx	Ol_Dsx	XP_034176725.1	Osmia lignaria
Hexapoda	Dsx	Ms_Dsx	XP_037293921.1	Manduca sexta
Hexapoda	Dsx	Td_Dsx	BAM93340.1	Trypoxylus dichotomus
Hexapoda	Dsx	Pc_Dsx	GDBY01045014.1	Ptilocerembia catherinae
Hexapoda	Dsx	Ar_Dsx	XP_012262263.1	Athalia rosae
